# Supplementary material for: Comparative transcriptomic analysis defines shared and mammary-specific gene expression programs across glandular tissues
Source: Research Square preprint supplement (doi:10.21203/rs.3.rs-8403790/v1), 2025-12-29
Supplement: Supplementary file 1 [file a3266b5b7e08884d079f75b4.docx]

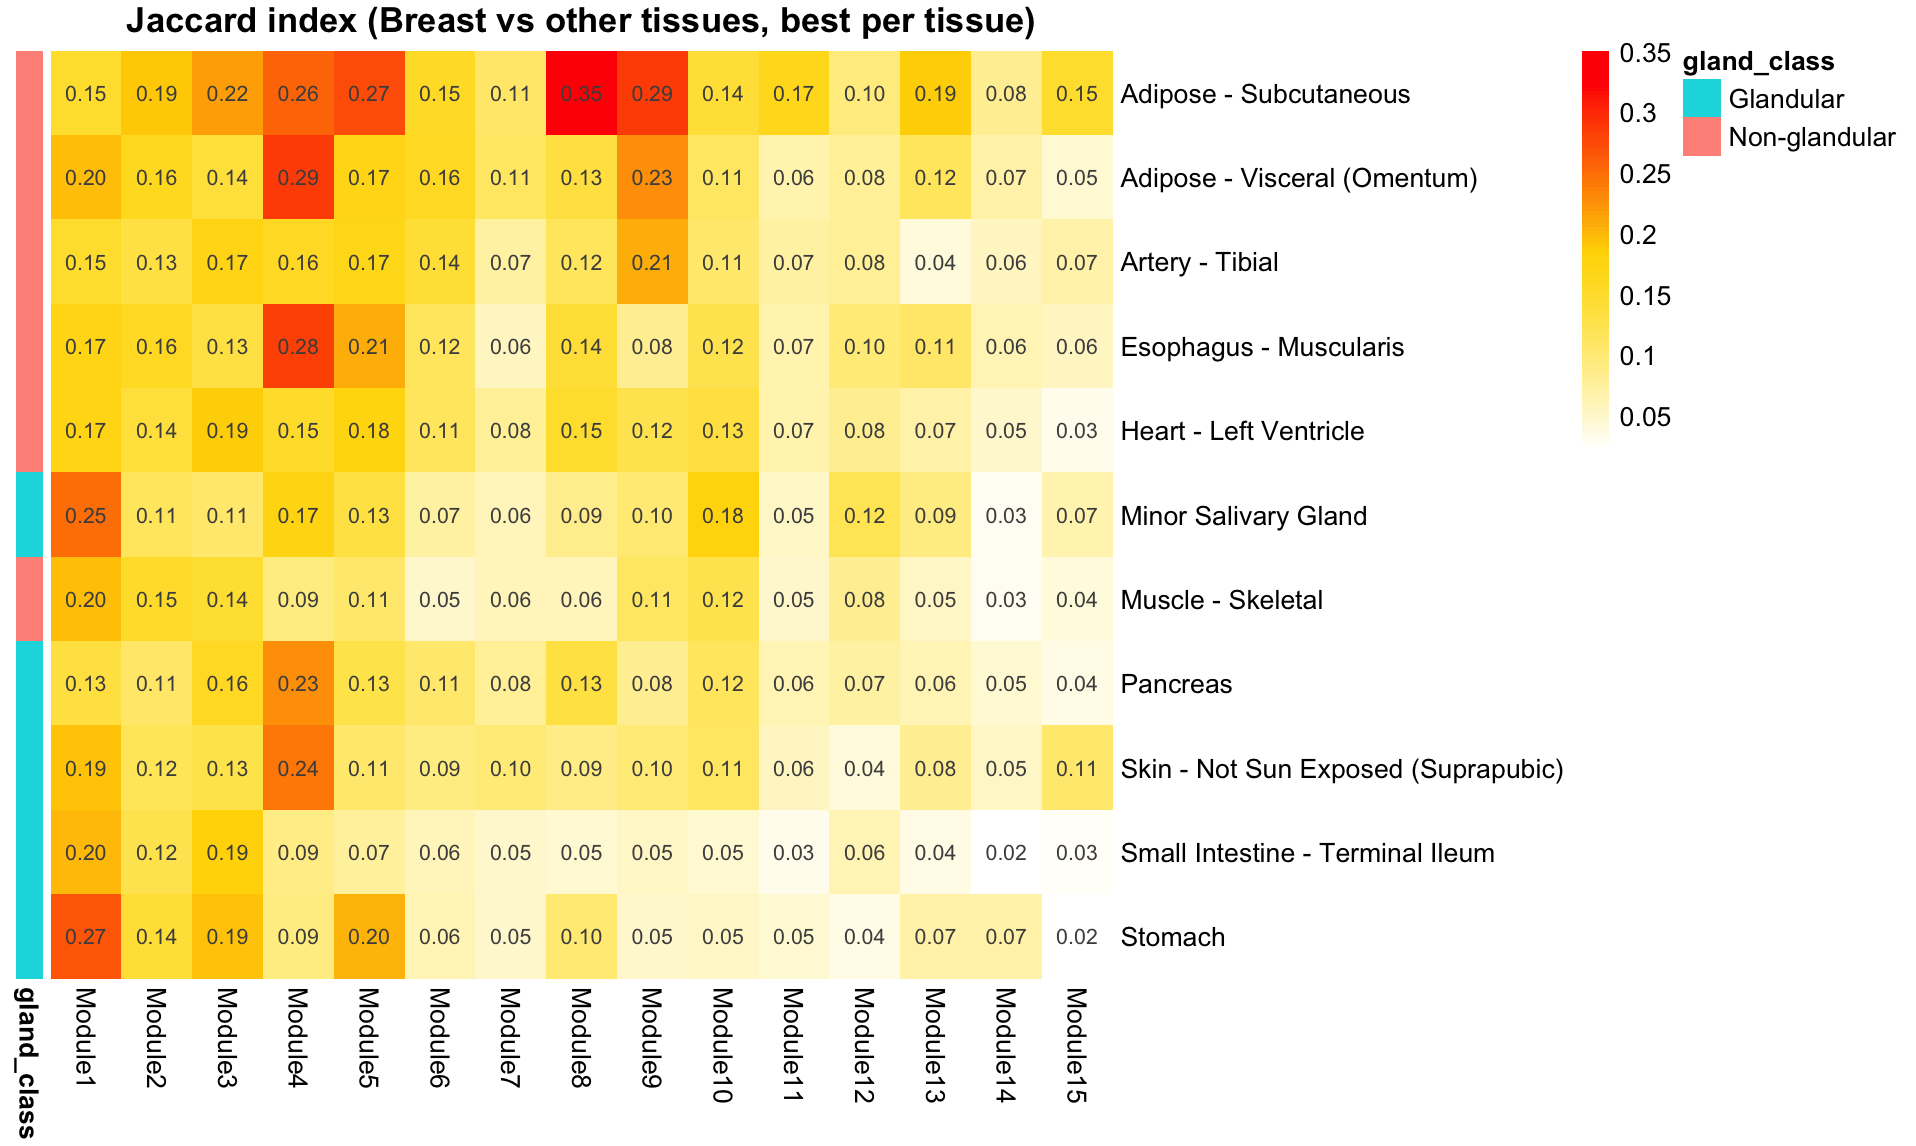


**Figure S1. Cross-tissue overlap of mammary co-expression modules.**

Heatmap showing Jaccard indices between mammary gland co-expression modules and modules derived from other GTEx tissues. For each non-mammary tissue, the Jaccard index represents the maximum overlap observed between a given mammary module and any module from that tissue (“best-per-tissue” overlap). Rows correspond to comparison tissues, and columns correspond to mammary co-expression modules. Tissues are annotated as glandular or non-glandular based on tissue classification. Warmer colors indicate higher Jaccard similarity.
